# Supplementary material
Source: PubMed Central journal article supplement (PMC4102627)
Supplement: NIHMS579920-supplement-Supplemental_tables.pdf [file NIHMS579920-supplement-Supplemental_tables.pdf]

SUPPLEMENTAL MATERIAL

**Supplemental Table I.** Hazard ratio (95% confidence intervals) of stroke mortality according to sleep duration: stratified by gender.

|                                       | Daily sleep duration |                  |            |                  |                  |
|---------------------------------------|----------------------|------------------|------------|------------------|------------------|
|                                       | ≤5 hours             | 6 hours          | 7 hours    | 8 hours          | ≥9 hours         |
| <b>Total stroke</b>                   |                      |                  |            |                  |                  |
| <b>Men</b>                            |                      |                  |            |                  |                  |
| Cases/person-years                    | 75/31179             | 143/91355        | 202/131562 | 183/114192       | 90/25362         |
| Multivariate model                    | 1.13 (0.86-1.47)     | 0.93 (0.75-1.16) | 1.00       | 0.98 (0.80-1.20) | 1.49 (1.16-1.92) |
| <b>Women</b>                          |                      |                  |            |                  |                  |
| Cases/person-years                    | 104/54584            | 148/124618       | 178/177415 | 183/141504       | 75/34990         |
| Multivariate model                    | 1.37 (1.08-1.75)     | 1.10 (0.88-1.37) | 1.00       | 1.23 (1.00-1.51) | 1.62 (1.24-2.13) |
| <b>Ischemic or unspecified stroke</b> |                      |                  |            |                  |                  |
| <b>Men</b>                            |                      |                  |            |                  |                  |
| Cases/person-years                    | 61/31179             | 101/91355        | 148/131562 | 141/114192       | 75/25362         |
| Multivariate model                    | 1.25 (0.92-1.69)     | 0.90 (0.69-1.15) | 1.00       | 1.03 (0.82-1.30) | 1.64 (1.23-2.17) |
| <b>Women</b>                          |                      |                  |            |                  |                  |
| Cases/person-years                    | 84/54584             | 120/124618       | 130/177415 | 139/141504       | 60/34990         |

SUPPLEMENTAL MATERIAL

|                    |                  |                  |           |                  |                  |
|--------------------|------------------|------------------|-----------|------------------|------------------|
| Multivariate model | 1.48 (1.12-1.95) | 1.22 (0.95-1.56) | 1.00      | 1.26 (0.99-1.60) | 1.74 (1.28-2.36) |
| Hemorrhagic stroke |                  |                  |           |                  |                  |
| Men                |                  |                  |           |                  |                  |
| Cases/person-years | 14/31179         | 42/91355         | 54/131562 | 42/114192        | 15/25362         |
| Multivariate model | 0.80 (0.44-1.44) | 1.04 (0.69-1.55) | 1.00      | 0.85 (0.57-1.27) | 1.04 (1.58-1.86) |
| Women              |                  |                  |           |                  |                  |
| Cases/person-years | 20/54584         | 28/124618        | 20/177415 | 44/141504        | 15/34990         |
| Multivariate model | 1.07 (0.63-1.81) | 0.78 (0.49-1.24) | 1.00      | 1.13 (0.75-1.70) | 1.30 (0.72-2.33) |

---

\*No significant interaction was found for total stroke mortality ( $P$ -interaction=0.53), deaths from ischemic or unspecified stroke ( $P$ -interaction=0.45), and deaths from hemorrhagic stroke ( $P$ -interaction=0.43). The multivariate model adjusted for age at recruitment, year of recruitment (1993-1995, 1996-1998), dialect (Hokkien, Cantonese), education (no formal education, primary school, secondary school or higher), body mass index (<20.0, 20.0-23.9, 24.0-27.9, and  $\geq 28.0$  kg/m<sup>2</sup>), alcohol drinking (none, monthly, weekly, daily), years of smoking (never, <20, 20-39, and  $\geq 40$  years), dose of smoking (never,  $\leq 12$ , 13-22, 23-32,  $\geq 33$  cigarettes/day), moderate activity (<0.5, 0.5-3.9, and  $\geq 4.0$  hours/week), energy intake (kcal/day), dietary intakes of vegetables, fruits, fiber, polyunsaturated fatty acids (g/day, quartiles), self-reported history of physician-diagnosed hypertension, diabetes, stroke and coronary heart disease, and history of cancer reported by the nationwide cancer registry.

SUPPLEMENTAL MATERIAL

**Supplemental Table II.** Hazard ratio (95% confidence intervals) of stroke mortality according to joint association between sleep duration and baseline hypertension status.\*

| Daily sleep duration                  | Without previous hypertension |                    | With previous hypertension |                    |
|---------------------------------------|-------------------------------|--------------------|----------------------------|--------------------|
|                                       | Cases/person-years            | Multivariate model | Cases/person-years         | Multivariate model |
| <b>Total stroke</b>                   |                               |                    |                            |                    |
| ≤5 hours                              | 97/62600                      | 1.16 (0.94-1.44)   | 82/23163                   | 2.13 (1.68-2.70)   |
| 6-8 hours                             | 627/610999                    | 1.00               | 410/169648                 | 1.66 (1.45-1.89)   |
| ≥9 hours                              | 82/44695                      | 1.38 (1.09-1.74)   | 83/15648                   | 2.69 (2.12-3.42)   |
| <b>Ischemic or unspecified stroke</b> |                               |                    |                            |                    |
| ≤5 hours                              | 78/62600                      | 1.23 (0.97-1.57)   | 67/23163                   | 2.20 (1.69-2.87)   |
| 6-8 hours                             | 469/610999                    | 1.00               | 310/23163                  | 1.59 (1.36-1.85)   |
| ≥9 hours                              | 64/44695                      | 1.42 (1.09-1.85)   | 71/23163                   | 2.82 (2.17-3.66)   |
| <b>Hemorrhagic stroke</b>             |                               |                    |                            |                    |
| ≤5 hours                              | 19/62600                      | 0.95 (0.59-1.52)   | 15/23163                   | 1.88 (1.09-3.22)   |
| 6-8 hours                             | 158/610999                    | 1.00               | 100/23163                  | 1.95 (1.49-2.54)   |
| ≥9 hours                              | 18/44695                      | 1.26 (0.77-2.06)   | 12/23163                   | 2.10 (1.15-3.82)   |

## SUPPLEMENTAL MATERIAL

\*The multivariate model adjusted for age at recruitment, year of recruitment (1993-1995, 1996-1998), dialect (Hokkien, Cantonese), education (no formal education, primary school, secondary school or higher), body mass index ( $<20.0$ ,  $20.0-23.9$ ,  $24.0-27.9$ , and  $\geq 28.0$  kg/m<sup>2</sup>), alcohol drinking (none, monthly, weekly, daily), years of smoking (never,  $<20$ ,  $20-39$ , and  $\geq 40$  years), dose of smoking (never,  $\leq 12$ ,  $13-22$ ,  $23-32$ ,  $\geq 33$  cigarettes/day), moderate activity ( $<0.5$ ,  $0.5-3.9$ , and  $\geq 4.0$  hours/week), energy intake (kcal/day), dietary intakes of vegetables, fruits, fiber, polyunsaturated fatty acids (g/day, quartiles), self-reported history of physician-diagnosed diabetes, stroke and coronary heart disease, and history of cancer reported by the nationwide cancer registry.
